# Supplementary material for: Trust and 2024 Public Priorities for the CDC and State Health Departments
Source: PubMed Central journal article supplement (PMC11127117; doi:10.1001/jamahealthforum.2024.0862), 2024-05-24
Supplement: jamahealthforum-e240862-s002.pdf [file jamahealthforum-e240862-s002.pdf]

## Data Sharing Statement

SteelFisher. Trust and 2024 Public Priorities for the CDC and State Health Departments. *JAMA Health Forum*. Published May 24, 2024. doi:10.1001/jamahealthforum.2024.0862

### Data

**Data available:** No

### Additional Information

**Explanation for why data not available:** The authors are not making these data available because additional publications from these data are forthcoming.
